# Supplementary material for: Edible Aquatic Insects: Diversities, Nutrition, and Safety
Source: MDPI journal article supplement (doi:10.3390/foods10123033), 2021-12-06
Supplement: s1 [file s1]

## Supplementary Material

**Table S1.** Full list of named edible aquatic insects. The species without genus name will not put into the table.

| Order         | Family         | Species                           | Countries                        | References |
|---------------|----------------|-----------------------------------|----------------------------------|------------|
| Ephemeroptera | Baetidae       | <i>Baetis</i> sp.                 | Mexico                           | [1]        |
|               |                | <i>Cloeon dipterum</i>            | Japan                            | [2,3]      |
|               |                | <i>C. kimminsi</i>                | India                            | [4]        |
|               | Caenidae       | <i>Caenis kungu</i>               | Malawi                           | [5,6]      |
|               | Ephemerellidae | <i>Teleganopsis jinghongensis</i> | China                            | [7,8]      |
|               |                | <i>Ephemera danica</i>            | India                            | [4,9]      |
|               |                | <i>Ephemera</i> sp.               | Mexico                           | [1]        |
|               |                | <i>Ephemera</i> sp.               | India                            | [4]        |
|               |                | <i>Sinephemera strigata</i>       | Japan                            | [10]       |
|               |                | <i>Plethogenesia</i> sp.          | Papua New Guinea                 | [5]        |
|               |                | <i>Povilla adusta</i>             | Kenya, Malawi, Tanzania, Uganda  | [5,11,12]  |
|               | Palingeniidae  |                                   |                                  |            |
| Odonata       | Aeschnidae     | <i>Aeschna</i> sp.                | Mexico                           | [1]        |
|               |                | <i>A. mixta</i>                   | India                            | [13]       |
|               |                | <i>Aeschna</i> sp.                | Thailand                         | [14]       |
|               |                | <i>Anax guttatus</i>              | Indonesia, Laos, Thailand        | [15,16]    |
|               |                | <i>An. parthenope</i>             | China, Japan                     | [17]       |
|               |                | <i>Anax</i> sp.                   | Madagascar, Mexico, Indonesia    | [1,6,18]   |
|               |                | <i>Coryphaeschna adnexa</i>       | Ecuador                          | [19]       |
|               |                | <i>Rhionaeschna brevifrons</i>    | Ecuador                          | [19]       |
|               |                | <i>R. multicolor</i>              | Mexico, USA                      | [1,6]      |
|               |                | <i>R. marchali</i>                | Ecuador                          | [19]       |
|               |                | <i>R. peralta</i>                 | Ecuador                          | [19]       |
|               | Calopterygidae | <i>Hetaerina</i> sp.              | Venezuela                        | [20]       |
|               |                | <i>Mnesarete</i> sp.              | Venezuela                        | [20]       |
|               |                | <i>Argia</i> sp.                  | Venezuela                        | [20]       |
|               |                | <i>Ceriagrion</i> sp.             | Thailand, Laos, Myanmar, Vietnam | [14,21,22] |
|               |                | <i>Enallagma</i> sp.              | India                            | [9]        |
|               |                | <i>Anotogaster sieboldii</i>      | Japan                            | [17]       |
|               |                | <i>Cordulegaster</i> sp.          | India                            | [23]       |
|               | Corduliidae    | <i>Epophthalmia elegans</i>       | China                            | [24]       |
|               |                | <i>E. vittigera</i>               | Thailand                         | [6,14,21]  |
|               |                | <i>Lauromacromia dubitalis</i>    | Venezuela                        | [20]       |
|               |                | <i>Macromia</i> sp.               | Thailand                         | [17]       |

| Order | Family       | Species                          | Countries                        | References   |
|-------|--------------|----------------------------------|----------------------------------|--------------|
|       | Gomphidae    | <i>Agriogomphus</i> sp.          | Venezuela                        | [20]         |
|       |              | <i>Davidius nanus</i>            | Japan                            | [17]         |
|       |              | <i>Gomphus cuneatus</i>          | China                            | [7,8]        |
|       |              | <i>G. vulgatissimus</i>          | Italy                            | [25]         |
|       |              | <i>Ictinogomphus rapax</i>       | India, China                     | [4,9,24]     |
|       |              | <i>Progomphus</i> sp.            | Venezuela                        | [20]         |
|       |              | <i>Sinictinogomphus clavatus</i> | China                            | [26]         |
|       |              | <i>Stylurus</i> sp.              | India                            | [9]          |
|       |              | <i>Zonophora</i> sp.             | Venezuela                        | [20]         |
|       | Lestidae     | <i>Lestes praemorsus</i>         | China                            | [8]          |
|       | Libellulidae | <i>Acisoma panorpoides</i>       | India                            | [6,23]       |
|       |              | <i>Brachythemis contaminata</i>  | India                            | [4,9]        |
|       |              | <i>Brechmorhoga</i> sp.          | Venezuela                        | [20]         |
|       |              | <i>Cratilla lineata</i>          | Indonesia                        | [16]         |
|       |              | <i>Crocothemis servilia</i>      | China, Indonesia, South Korea    | [8,16,17,27] |
|       |              | <i>Crocothemis</i> sp.           | Laos, Myanmar, Thailand, Vietnam | [22]         |
|       |              | <i>Dasythemis</i> sp.            | Venezuela                        | [20]         |
|       |              | <i>Diplacodes</i> sp.            | India                            | [9]          |
|       |              | <i>Diplacodes trivialis</i>      | India                            | [4]          |
|       |              | <i>Libellula carolina</i>        | India                            | [13]         |
|       |              | <i>L. pulchella</i>              | Thailand                         | [6]          |
|       |              | <i>Neurothemis fluctuans</i>     | India                            | [13]         |
|       |              | <i>Neurothemis</i> sp.           | Indonesia                        | [6]          |
|       |              | <i>N. ramburii</i>               | Indonesia                        | [16]         |
|       |              | <i>Orthetrum albistylum</i>      | China                            | [28]         |
|       |              | <i>O. glaucum</i>                | Indonesia                        | [16]         |
|       |              | <i>O. japonicum</i>              | Japan                            | [17]         |
|       |              | <i>O. pruinosum</i>              | China                            | [24]         |
|       |              | <i>O. sabina</i>                 | Indonesia                        | [16]         |
|       |              | <i>Orthetrum</i> sp.             | Malaysia, Sabah                  | [29]         |
|       |              | <i>O. triangulare</i>            | China, Japan                     | [17,28]      |
|       |              | <i>Pachydiplax</i> sp.           | India                            | [9]          |
|       |              | <i>Pantala flavescens</i>        | China, Indonesia                 | [16,17,30]   |
|       |              | <i>Potamarcha obscura</i>        | Indonesia                        | [16]         |
|       |              | <i>Rhyothemis</i> sp.            | Thailand                         | [6,14,21]    |
|       |              | <i>Sympetrum darwinianum</i>     | Japan                            | [2]          |

| Order      | Family            | Species                         | Countries                           | References            |
|------------|-------------------|---------------------------------|-------------------------------------|-----------------------|
|            |                   | <i>S. eroticum</i>              | Japan                               | [2]                   |
|            |                   | <i>S. frequens</i>              | Japan                               | [17]                  |
|            |                   | <i>S. infuscatum</i>            | Japan                               | [2]                   |
|            |                   | <i>S. pedemontanum</i>          | Japan                               | [17]                  |
|            |                   | <i>Sympetrum</i> sp.            | India                               | [9]                   |
|            |                   | <i>S. speciosum</i>             | China                               | [31]                  |
|            |                   | <i>S. uniforme</i>              | China                               | [28]                  |
|            |                   | <i>Tramea transmarina</i>       | Indonesia                           | [15]                  |
|            |                   | <i>Trithemis arteriosa</i>      | D.R.Congo                           | [32]                  |
|            |                   | <i>T. aurora</i>                | Indonesia                           | [16]                  |
|            |                   | <i>Trithemis</i> sp.            | Madagascar                          | [18]                  |
|            |                   | <i>Urothemis</i> sp.            | India                               | [9]                   |
|            | Macromiidae       | <i>Macroma</i> sp.              | Thailand                            | [6]                   |
|            | Megapodagrionidae | <i>Oxystigma</i> sp.            | Venezuela                           | [20]                  |
| Plecoptera | Nemouridae        | <i>Nemoura</i> sp.              | India                               | [4]                   |
|            | Perlidae          | <i>Kamimuria tibialis</i>       | Japan                               | [2,3]                 |
|            |                   | <i>Oyamia gibba</i>             | Japan                               | [17]                  |
|            |                   | <i>Paragnetina tinctipennis</i> | Japan                               | [2,3]                 |
|            |                   | <i>Perla tibialis</i>           | Japan                               | [2]                   |
|            | Perlodidae        | <i>Isoperla</i> sp.             | USA                                 | [6]                   |
|            |                   | <i>Perlodes frisonana</i>       | Japan                               | [17]                  |
|            | Pteronarcyidae    | <i>Pteronarcys californica</i>  | USA                                 | [33]                  |
|            |                   | <i>P. dorsata</i>               | India, USA                          | [4,34]                |
|            |                   | <i>P. princeps</i>              | USA                                 | [34]                  |
|            |                   | <i>P. reticulata</i>            | Japan                               | [17]                  |
| Hemiptera  | Aphelocheiridae   | <i>Aphelocheirus vitattus</i>   | Japan                               | [35]                  |
|            | Belostomatidae    | <i>Abedus dilatatus</i>         | Mexico                              | [1]                   |
|            |                   | <i>Ab. ovatus</i>               | Mexico                              | [6]                   |
|            |                   | <i>Abedus</i> sp.               | Mexico                              | [1,6]                 |
|            |                   | <i>Belostoma micantulum</i>     | Venezuela                           | [20]                  |
|            |                   | <i>Belostoma</i> sp.            | D.R. Congo, Mexico                  | [1,6]                 |
|            |                   | <i>Diplonychus japonicas</i>    | Japan                               | [17]                  |
|            |                   | <i>D. rusticus</i>              | Thailand                            | [36]                  |
|            |                   | <i>Diplonychus</i> sp.          | Thailand                            | [21]                  |
|            |                   | <i>Hydrocyrius punctatus</i>    | Madagascar                          | [18]                  |
|            |                   | <i>Lethocerus americanus</i>    | USA                                 | [6]                   |
|            |                   | <i>L. cordofanus</i>            | Cameroon, Zambebian region          | [32,37]               |
|            |                   | <i>Le. deyrollei</i>            | China, Japan                        | [2,28]                |
|            |                   | <i>Le. indicus</i>              | China, India, Laos, Malaysia, Mali, | [4,6,7,9,17,21,22,38] |

| Order | Family     | Species                          | Countries                                        | References  |
|-------|------------|----------------------------------|--------------------------------------------------|-------------|
|       |            |                                  | Myanmar, Singapore, Sri Lanka; Thailand, Vietnam |             |
|       |            | <i>Lethocerus</i> sp.            | Mexico, Republic of Congo                        | [6,17]      |
|       |            | <i>Le. europdeum</i>             | Thailand                                         | [17]        |
|       |            | <i>Limnogeton fieberi</i>        | Togo                                             | [39]        |
|       |            | <i>Macrocheraia grandis</i>      | India                                            | [23]        |
|       |            | <i>Sphaerodema molestum</i>      | Thailand                                         | [6]         |
|       |            | <i>Sp. rustica</i>               | China, Indonesia, Thailand                       | [6,7]       |
|       |            | <i>Sp. molestum</i>              | Thailand                                         | [6]         |
|       | Corixidae  | <i>Corisella edulis</i>          | Mexico                                           | [1,6]       |
|       |            | <i>Co. texcocana</i>             | Mexico                                           | [1,40–42]   |
|       |            | <i>Co. mercenaria</i>            | Mexico                                           | [1,6,40,41] |
|       |            | <i>Corixa esculenta</i>          | Egypt                                            | [17]        |
|       |            | <i>Cor. femorale</i>             | Mexico                                           | [17]        |
|       |            | <i>Graptocorixa abdominalis</i>  | Mexico                                           | [1,40,41]   |
|       |            | <i>Gr. bimaculata</i>            | Mexico                                           | [40–42]     |
|       |            | <i>Graptocorixa</i> sp.          | Mexico                                           | [43]        |
|       |            | <i>Hesperocorixa distantii</i>   | Japan                                            | [17]        |
|       |            | <i>H. laevignata</i>             | Mexico                                           | [44]        |
|       |            | <i>Krizousacorixa azteca</i>     | Mexico                                           | [1,6,40,41] |
|       |            | <i>K. femorata</i>               | Mexico                                           | [1,6,40,41] |
|       |            | <i>Micronecta sedula</i>         | China                                            | [28]        |
|       |            | <i>Sigara substriata</i>         | China                                            | [28]        |
|       | Gerridae   | <i>Cylindrostethus scrutator</i> | Thailand                                         | [14]        |
|       |            | <i>Gerris</i> sp.                | India                                            | [6,45]      |
|       |            | <i>Ge. spinole</i>               | India                                            | [6]         |
|       | Naucoridae | <i>Ambrysus stali</i>            | Venezuela                                        | [20]        |
|       |            | <i>Am. usingeri</i>              | Venezuela                                        | [20]        |
|       |            | <i>Heleocoris naucoroides</i>    | Madagascar                                       | [18]        |
|       |            | <i>Limnocorus cf. minutus</i>    | Venezuela                                        | [20]        |
|       | Nepidae    | <i>Laccotrephes griseus</i>      | Thailand                                         | [6]         |
|       |            | <i>La. japonensis</i>            | Japan                                            | [2]         |
|       |            | <i>La. robustus</i>              | Indonesia                                        | [15]        |
|       |            | <i>La. ruber</i>                 | Laos, Thailand                                   | [14,21,22]  |

| Order         | Family       | Species                          | Countries                     | References          |
|---------------|--------------|----------------------------------|-------------------------------|---------------------|
|               | Notonectidae | <i>Laccotrephes</i> sp.          | Madagascar                    | [18]                |
|               |              | <i>La. flavovenosa</i>           | Japan, South Korea            | [17]                |
|               |              | <i>La. maculatus</i>             | India                         | [27]                |
|               |              | <i>Nepa</i> sp.                  | Madagascar                    | Decary, 1937        |
|               |              | <i>Nepa</i> sp.                  | Thailand                      | [6]                 |
|               |              | <i>Ranatra chinensis</i>         | Japan, Laos, Thailand         | Nonaka, 1999 [2,17] |
|               |              | <i>Ra. longipes</i>              | Thailand                      | [14,21]             |
|               |              | <i>Ranatra</i> sp.               | India                         | [23]                |
|               |              | <i>Ra. unicolor</i>              | Japan                         | [2]                 |
|               |              | <i>Ra. varipes</i>               | Thailand                      | [14,21]             |
|               |              | <i>Sphaerocoris</i> sp.          | Malawi                        | Shaxon et al., 1985 |
|               |              | <i>Anisops barbata</i>           | Thailand                      | [14,21]             |
|               |              | <i>Ani. bouvieri</i>             | Thailand                      | [14,21]             |
|               |              | <i>Ani. nasutus</i>              | China                         | [28]                |
|               |              | <i>Anisops</i> sp.               | India, Laos, Myanmar, Vietnam | [22,23]             |
|               |              | <i>Enithares sinica</i>          | China                         | [28]                |
|               |              | <i>Notonecta chinensis</i>       | China                         | [28]                |
|               |              | <i>No. fasciata</i>              | Mexico                        | [44]                |
|               |              | <i>Notonecta</i> sp.             | Myanmar                       | [6]                 |
|               |              | <i>Notonecta</i> sp.             | Mexico                        | [1,43]              |
|               |              | <i>No. undulata</i>              | Thailand                      | [21]                |
|               |              | <i>No. unifasciata</i>           | Mexico                        | [1,6]               |
| Megalopectera | Corydalidae  | <i>Acanthacorydalis asiatica</i> | China                         | [46]                |
|               |              | <i>Ac. fruhstorferi</i>          | China                         | [46]                |
|               |              | <i>Ac. orientalis</i>            | China                         | [7,8]               |
|               |              | <i>Ac. sinensis</i>              | China                         | [46]                |
|               |              | <i>Ac. unimaculata</i>           | China                         | [46]                |
|               |              | <i>Ac. yunnanensis</i>           | China                         | [46]                |
|               |              | <i>Corydalus armatus</i>         | Peru                          | [47]                |
|               |              | <i>Cs. cornutus</i>              | Mexico                        | [43]                |
|               |              | <i>Corydalus</i> sp.             | Colombia, Venezuela           | [1,6,20,48]         |
|               |              | <i>Cs. peruvianus</i>            | Peru                          | [47]                |
|               |              | <i>Neoneuromus ignobilis</i>     | China                         | [46]                |
|               |              | <i>Ne. maclachlani</i>           | China                         | [46]                |
|               |              | <i>Parachauliodes japonicas</i>  | Japan                         | [17]                |
|               |              | <i>Protohermes grandis</i>       | Japan                         | [2,49]              |
|               |              | <i>Pr. xanthodes</i>             | China                         | [50]                |
| Coleoptera    | Dytiscidae   | <i>Acilius</i> sp.               | China                         | [51]                |
|               |              | <i>Agabus fulvipennis</i>        | China                         | [51]                |
|               |              | <i>Copelatus</i> sp.             | Thailand                      | [14,21]             |

| Order | Family | Species                                     | Countries                                                            | References         |
|-------|--------|---------------------------------------------|----------------------------------------------------------------------|--------------------|
|       |        | <i>Cybister bengalensis</i>                 | China                                                                | [6,51]             |
|       |        | <i>Cy. brevis</i>                           | Japan                                                                | [2]                |
|       |        | <i>Cy. cinctus</i>                          | Madagascar                                                           | [18]               |
|       |        | <i>Cy. confusus</i>                         | India                                                                | [45]               |
|       |        | <i>Cy. desjardinsii</i>                     | Madagascar                                                           | [18]               |
|       |        | <i>Cy. distinctus</i>                       | Senegal, Sierra Leone,<br>D.R.Congo                                  | [51]               |
|       |        | <i>Cy. ellipticus</i>                       | USA                                                                  | [51]               |
|       |        | <i>Cy. explanatus</i>                       | Mexico, USA                                                          | [6,51,52]          |
|       |        | <i>Cy. fimbriolatus</i>                     | China, Mexico                                                        | [43,51]            |
|       |        | <i>Cy. flavocinctus</i>                     | China, Mexico                                                        | [1,51,52]          |
|       |        | <i>Cy. guerini</i>                          | China, Indonesia                                                     | [6,51]             |
|       |        | <i>Cy. hova</i>                             | Madagascar                                                           | [53]               |
|       |        | <i>Cy. insignis</i>                         | Gabon                                                                | [51]               |
|       |        | <i>Cy. japonicas</i>                        | China, Japan, North<br>Korea, South Korea                            | [2,6,51,54–56]     |
|       |        | <i>Cy. lewisianus</i>                       | China, Laos, Myanmar,<br>Sri Lanka, Thailand,<br>Vietnam             | [21,22,38,51]      |
|       |        | <i>Cy. limbatus</i>                         | China, Laos, Thailand                                                | [6,14,21,22,51,56] |
|       |        | <i>Cy. occidentalis</i>                     | Cameroon, China,<br>Mexico                                           | [51,52]            |
|       |        | <i>Cy. operosus</i>                         | Madagascar                                                           | [18]               |
|       |        | <i>Cy. owas</i>                             | Madagascar                                                           | [53]               |
|       |        | <i>Cy. posticus</i>                         | India                                                                | [45]               |
|       |        | <i>Cy. rugosus</i>                          | Laos, Myanmar,<br>Thailand, Vietnam                                  | [14,21,22]         |
|       |        | <i>Cy. singulatus</i>                       | China, Japan                                                         | [51]               |
|       |        | <i>Cybister</i> sp.                         | Benin, Cambodia,<br>Malaysia, Sabah, Togo                            | [29,39,51,57]      |
|       |        | <i>Cybister</i> sp.                         | Benin, Togo                                                          | [57]               |
|       |        | <i>Cybister</i> sp.                         | Mexico                                                               | [52]               |
|       |        | <i>Cybister</i> sp.                         | Vietnam, Laos,<br>Thailand, Cambodia,<br>Myanmar, Malaysia,<br>Sabah | [6,51]             |
|       |        | <i>Cy. sticticus</i>                        | China                                                                | [17]               |
|       |        | <i>Cy. sugillatus</i>                       | China, Japan                                                         | [6,51]             |
|       |        | <i>Cy. tripunctatus</i><br><i>asiaticus</i> | India, Thailand                                                      | [14,21]            |

| Order | Family  | Species                       | Countries                                                                     | References           |
|-------|---------|-------------------------------|-------------------------------------------------------------------------------|----------------------|
|       |         | <i>Cy. tripunctatus</i>       | China, India, Indonesia, Japan, North Korea, South Korea, Sri Lanka, Thailand | [6,15,54,58]         |
|       |         | <i>Cy. ventralis</i>          | China                                                                         | [17]                 |
|       |         | <i>Cy. vulneratus</i>         | Africa, Madagascar                                                            | [18,51]              |
|       |         | <i>Cypris</i> sp.             | Thailand                                                                      | [17,59]              |
|       |         | <i>Dytiscus circumflex</i>    | Africa                                                                        | [51]                 |
|       |         | <i>Dy. habilis</i>            | China, Japan, Mexico                                                          | [51,52]              |
|       |         | <i>Dy. marginalis</i>         | China, Japan, Turkey                                                          | [6,51,60]            |
|       |         | <i>Dy. marginicollis</i>      | Mexico                                                                        | [52]                 |
|       |         | <i>Dytiscus</i> sp.           | Cameroon, India                                                               | [4,51]               |
|       |         | <i>Dy. validus</i>            | China; Japan                                                                  | [51]                 |
|       |         | <i>Eretes sticticus</i>       | China, India, Kenya, Laos, Malaysia, Myanmar, Sri Lanka, Thailand; Vietnam    | [4,6,14,21,22,51,52] |
|       |         | <i>Hydraticus rhantoides</i>  | Thailand                                                                      | [14,21]              |
|       |         | <i>Laccophilus apicalis</i>   | Mexico                                                                        | [51]                 |
|       |         | <i>Lac. fasciatus</i>         | Mexico                                                                        | [52]                 |
|       |         | <i>Lac. pulicarius</i>        | Thailand                                                                      | [14,21]              |
|       |         | <i>Laccophilus</i> sp.        | India                                                                         | [23]                 |
|       |         | <i>Laccophilus</i> sp.        | Mexico                                                                        | [61]                 |
|       |         | <i>Megadytes giganteus</i>    | Mexico                                                                        | [52]                 |
|       |         | <i>M. gigantean</i>           | Mexico                                                                        | [51]                 |
|       |         | <i>Megadytus</i> sp.          | Mexico                                                                        | [1,61]               |
|       |         | <i>Platambus guttulus</i>     | China                                                                         | [51]                 |
|       |         | <i>Rhantaticus congestus</i>  | Thailand                                                                      | [14,21]              |
|       |         | <i>Rh. atricolor</i>          | Mexico                                                                        | [1,51,61]            |
|       |         | <i>Rh. consimilis</i>         | Madagascar, Mexico                                                            | [51,52]              |
|       |         | <i>Rh. latus</i>              | Madagascar                                                                    | [51]                 |
|       |         | <i>Rh. pulverosus</i>         | Japan                                                                         | [2]                  |
|       |         | <i>Rhantus</i> sp.            | Mexico                                                                        | [6,51,61]            |
|       |         | <i>Rh. suturalis</i>          | Japan                                                                         | [2]                  |
|       |         | <i>Thermonectus basilaris</i> | Mexico                                                                        | [52]                 |
|       |         | <i>Th. marmoratus</i>         | Mexico                                                                        | [52]                 |
|       |         | <i>Thermonetus</i> sp.        | Mexico                                                                        | [61]                 |
|       | Elmidae | <i>Austrelmis chilensis</i>   | Chile, Peru                                                                   | [6,51]               |
|       |         | <i>Au. condimentarius</i>     | Chile, Peru, Mexico                                                           | [6,51]               |

| Order | Family        | Species                       | Countries                                                | References     |
|-------|---------------|-------------------------------|----------------------------------------------------------|----------------|
|       | Gyrinidae     | <i>Aulonogyrus strigosus</i>  | Australia                                                | [55]           |
|       |               | <i>Dineutes marginatus</i>    | Japan                                                    | [2]            |
|       |               | <i>Di. orientalis</i>         | Japan                                                    | [17]           |
|       |               | <i>Dineutes</i> sp.           | Madagascar                                               | [18]           |
|       |               | <i>Gyrinus curtus</i>         | Japan                                                    | [2]            |
|       |               | <i>Gy. japonicas</i>          | Japan                                                    | [2]            |
|       |               | <i>Gy. parvus</i>             | Mexico                                                   | [52]           |
|       |               | <i>Gy. plicatus</i>           | Mexico                                                   | [52]           |
|       |               | <i>Macrogyrus</i>             | Australia                                                | [62]           |
|       |               | <i>viridisulcatus</i>         |                                                          |                |
|       |               | <i>Porrorhynchus</i>          | Japan                                                    | [2]            |
|       |               | <i>marginatus</i>             |                                                          |                |
|       | Haliplidae    | <i>Haliplus punctatus</i>     | Mexico                                                   | [52]           |
|       |               | <i>Haliplus</i> sp.           | Mexico                                                   | [61]           |
|       |               | <i>Peltodytes mexicanus</i>   | Mexico                                                   | [52]           |
|       |               | <i>Pe. ovalis</i>             | Mexico                                                   | [52]           |
|       |               | <i>Hololepta guidonis</i>     | Mexico                                                   | [51]           |
|       |               | <i>Hololepta</i> sp.          | Mexico                                                   | [6]            |
|       | Hydrophilidae | <i>Berosus</i> sp.            | Mexico                                                   | [52]           |
|       |               | <i>Dibolocelus</i> sp.        | Mexico                                                   | [43,61]        |
|       |               | <i>Hydrobiomorpha</i>         | Thailand                                                 | [21]           |
|       |               | <i>spenicollis</i>            |                                                          |                |
|       |               | <i>Hy. spenicollis</i>        | Thailand                                                 | [14]           |
|       |               | <i>Hydrochara</i> sp.         | Thailand                                                 | [36]           |
|       |               | <i>Hydrophilus acuminatus</i> | China, India, Japan, Mali, North Korea, South Korea      | [6,7,17,51,54] |
|       |               | <i>Hyd. affinis</i>           | Japan, Laos                                              | [3,36]         |
|       |               | <i>Hyd. bilineatus</i>        | China, Japan, Laos, Myanmar, Thailand, Vietnam           | [6,21,22]      |
|       |               | <i>Hyd. cavisternum</i>       | China, Japan, Laos, Thailand, Vietnam                    | [22,51,63]     |
|       |               | <i>Hyd. hastatus</i>          | Cambodia, China, Japan, Laos, Myanmar, Thailand, Vietnam | [6,51]         |
|       |               | <i>Hyd. marginatus</i>        | Senegal                                                  | [51]           |
|       |               | <i>Hyd. olivaceus</i>         | India, Sri Thailand                                      | [6,63]         |
|       |               | <i>Hyd. pallidipalpes</i>     | China, India                                             | [6,51]         |
|       |               | <i>Hyd. piceus</i>            | Turkey                                                   | [60]           |
|       |               | <i>Hyd. picicornis</i>        | Philippines                                              | [6]            |
|       |               | <i>Hyd. senegalensis</i>      | Senegal                                                  | [51]           |



| Order   | Family        | Species                      | Countries                       | References |
|---------|---------------|------------------------------|---------------------------------|------------|
|         |               | <i>Hydrophilus</i> sp.       | Benin, Togo                     | [39,43,52] |
|         |               | <i>Hydrophilus</i> sp.       | China                           | [55]       |
|         |               | <i>Hydrophilus</i> sp.       | Thailand, India                 | [4,6]      |
|         |               | <i>Sternolophus rufipes</i>  | Japan, Thailand                 | [3,14,21]  |
|         |               | <i>Sternolophus</i> sp.      | Madagascar                      | [18]       |
|         |               | <i>Tropisternus collaris</i> | Japan                           | [51]       |
|         |               | <i>Tr. mexicanus</i>         | Mexico, Panama                  | [51,52]    |
|         |               | <i>Tropisternus</i> sp.      | Mexico                          | [61]       |
|         |               | <i>Tr. sublaevis</i>         | Mexico                          | [51,52]    |
|         |               | <i>Tr. tinctus</i>           | Mexico                          | [6,52]     |
|         | Noteridae     | <i>Suphisellus</i> sp.       | Mexico                          | [51,52]    |
| Diptera | Chaoboridae   | <i>Chaoborus anomalus</i>    | Uganda                          | [64,65]    |
|         |               | <i>Ch. edulis</i>            | Kenya, Malawi, Tanzania, Uganda | [6,17,66]  |
|         |               | <i>Ch. pallidipes</i>        | Uganda                          | [66]       |
|         |               | <i>Chaoborus</i> sp.         | East African lakes              | [12,66]    |
|         |               | <i>Procladius umbrosus</i>   | Uganda                          | [64]       |
|         |               | <i>Tanypus guttatipennis</i> | Uganda                          | [64]       |
|         | Chironomidae  | <i>Chironomus</i> sp.        | Kenya, Tanzania, Uganda         | [12]       |
|         | Ephydriidae   | <i>Ephydra cinerea</i>       | USA                             | [6]        |
|         |               | <i>Ep. hians</i>             | Mexico, USA                     | [1,67]     |
|         |               | <i>Ep. macellaria</i>        | USA                             | [6]        |
|         |               | <i>Mosillus tibialis</i>     | Mexico                          | [68]       |
|         | Rhagionidae   | <i>Atherix</i> sp.           | Nearctic                        | [6]        |
|         | Simuliidae    | <i>Simulium aureohirtum</i>  | Thailand                        | [17]       |
|         |               | <i>Si. rubrithorax</i>       | Brazil, Venezuela               | [6,17,69]  |
|         |               | <i>Simulium</i> sp.          | Sri Lanka                       | [17]       |
|         | Stratiomyidae | <i>Chrysochlorina</i> sp.    | Colombia, Venezuela             | [6,48]     |
|         | Syrphidae     | <i>Copestylum anna</i>       | Mexico                          | [1]        |
|         |               | <i>Copestylum haagii</i>     | Mexico                          | [6]        |
|         |               | <i>Eristalis</i> sp.         | Mexico                          | [1]        |
|         |               | <i>Eristalis tenax</i>       | Japan                           | [3,17]     |
|         |               | <i>Antocha spinifera</i>     | Japan                           | [17]       |
|         | Tipulidae     | <i>Holorusia hespera</i>     | USA                             | [6]        |
|         |               | <i>Ho. rubiginosa</i>        | N. Am.                          | [6]        |
|         |               | <i>Tipula derbyi</i>         | USA                             | [6]        |
|         |               | <i>Ti. paludosa</i>          | China                           | [7]        |
|         |               | <i>Ti. quaylii</i>           | USA                             | [6]        |
|         |               | <i>Ti. simplex</i>           | USA                             | [6]        |

| Order       | Family          | Species                         | Countries                      | References |
|-------------|-----------------|---------------------------------|--------------------------------|------------|
| Trichoptera | Calamoceratidae | <i>Phylloicus</i> sp.           | Venezuela                      | [20]       |
|             | Hydropsychidae  | <i>Cheumatopsyche</i>           | Japan                          | [49]       |
|             |                 | <i>brevilineata</i>             |                                |            |
|             |                 | <i>Hydropsyche ulmeri</i>       | Japan                          | [17]       |
|             |                 | <i>Leptonema</i> sp.            | Colombia,<br>Mexico, Venezuela | [6,20,48]  |
|             | Leptoceridae    | <i>Macrostemum radiatum</i>     | Japan                          | [17]       |
|             |                 | <i>Oecetis disjuncta</i>        | Mexico                         | [43]       |
|             |                 | <i>Triplectides</i> sp.         | Venezuela                      | [20]       |
|             | Limnephilidae   | <i>Allophylax</i> sp.           | Japan                          | [35]       |
|             | Odontoceridae   | <i>Marilia</i> sp.              | Venezuela                      | [20]       |
|             | Phryganeidae    | <i>Eubasilissa regina</i>       | Japan                          | [17]       |
|             |                 | <i>Phryganea japonica</i>       | Japan                          | [17]       |
|             |                 | <i>Semblis melaleuca</i>        | Japan                          | [17]       |
|             | Rhyacophilidae  | <i>Rhyacophila nigrocephala</i> | Japan                          | [17]       |
|             | Stenopsychidae  | <i>Parastenopsyche sauteri</i>  | Japan                          | [49]       |
|             |                 | <i>Stenopsyche griseipennis</i> | Japan                          | [6]        |
|             |                 | <i>St. marmorata</i>            | Japan                          | [6]        |
|             |                 | <i>St. sauteri</i>              | Japan                          | [49]       |

## References

- Ramos-Elorduy, J.; Pino Moreno, J.M.; Correa, S.C. Edible insects of the state of Mexico and determination of their nutritive values. *An. Inst. Biol. Univ. Nac. Auton. Mex. Ser. Zool.* **1998**, *69*, 65-104.
- Schmitschek, E. Insekten als nahrung, in brauchtum, kult und kultur. handbuch der zoologie-eine naturgeschichte der stämme des tierreichs. *Handbuch der Zoologie-eine Naturgeschichte der Stämme des Tierreichs* **1968**, *4*, 1-62.
- Jongema, Y. List of edible insect species of the world. Available online: <https://www.wur.nl/en/Research-Results/Chair-groups/Plant-Sciences/Laboratory-of-Entomology/Edible-insects/Worldwide-species-list.htm> (accessed on 15 June 2021).
- Singh, O.; Nabam, S.; Chakravorty, J. Edible insects of Nishi tribe of Arunachal Pradesh. *Hexapoda* **2007**, *14*, 56-60.
- Grant, P.M. Mayflies as Food. In *Trends in Research in Ephemeroptera and Plecoptera*, Domínguez, E., Ed.; Springer US: Boston, MA, USA, 2001; pp. 107-124.
- DeFoliart, G.R. *The human use of insects as a food resource: a bibliographic account in progress*; University of Wisconsin: Wisconsin, WI, USA, 2002.
- Chen, X.M.; Feng, Y. *The edible insects of China*; Beijing, China, 1999; p. 180.
- Chen, X.M.; Feng, Y.; Chen, Z.Y. Common edible insects and their utilization in China. *Entomol. Res.* **2009**, *39*, 299-303.
- Chakravorty, J.; Ghosh, S.; Meyer-Rochow, V.B. Practices of entomophagy and entomotherapy by members of the Nyishi and Galo tribes, two ethnic groups of the state of Arunachal Pradesh (North-East India). *J. Ethnobiol. Ethnomed.* **2011**, *7*, 5, doi:10.1186/1746-4269-7-5.
- Kuwana, S. Important Insect Pests of the Rice Crop in Japan. *Proc. 4th Pac. Sci. Cong.* **1930**, *4*, 209-216.
- Macadam, C.R.; Stockan, J.A. More than just fish food: ecosystem services provided by freshwater insects. *Ecol. Entomol.* **2015**, *40*, 113-123.
- Ayieko, M.; Nyambuga, I. *Termites and lake flies in the livelihood of households within the Lake Victoria region: Methods for harvesting and utilization*; Techn. Report for the National Museums of Kenya: Nairobi, Kenya, 2009; pp. 1-11.
- Ronghang, R.; Ahmed, R. Edible insects and their conservation strategy in Karbi Anglong district of Assam, North East India. *The Bioscan* **2010**, *2*, 515-521.
- Hanboonsong, Y. Edible insects and associated food habits in Thailand. In *Proceedings of the Forest insects as food: humans bite back*, Proceedings of a workshop on Asia-Pacific resources and their potential for development, Chiang Mai, Thailand, 2010; pp. 173-182.
- van der Meer Mohr, J.C. Insects eaten by the Karo-Batak people (a contribution to entomo-bromatology). *Entomologische Berichten* **1965**, *25*, 101-107.
- Césard, N. Des libellules dans l'assiette: les insectes consommés à Bali. *Insectes* **2006**, *140*, 3-6.
- Mitsuhashi, J. *Edible insects of the world*; CRC press: Boca Raton, FL, USA, 2016; p. 296.

18. Randrianandrasana, M.; Berenbaum, M.R. Edible non-crustacean arthropods in rural communities of Madagascar. *J. Ethnobiol.* **2015**, *35*, 354-383.
19. Onore, G. Edible insects in Ecuador. In *Ecological Implications of Minilivestock: Potential of Insects, Rodents, Frogs, and Snails*, Paoletti, M.G., Ed.; Science Publishers Inc.: Enfield, NH, USA, 2005; pp. 343-352.
20. Araújo, Y.; Beserra, P. Diversidad en invertebrados consumidos por las etnias Yanomami y Yekuana del Alto Orinico, Venezuela. *Interciencia* **2007**, *32*, 318-323.
21. Hanboonsong, Y.; Rattanapan, A.; Utsunomiya, Y.; Masumoto, K. Edible insects and insect-eating habits in northeastern Thailand. *Elytra* **2000**, *28*, 355-364.
22. Yhoung-Aree, J.; Viwatpanich, K. Edible Insects in the Laos PDR, Myanmar, Thailand, and Vietnam. In *Ecological implications of minilivestock: potential of insects, rodents, frogs and snails*, Paoletti, M.G., Ed.; Science Publishers Inc.: Enfield, NH, USA, 2005; pp. 415-440.
23. Meyer-Rochow, V. Traditional food insects and spiders in several ethnic groups of Northeast India, Papua New Guinea, Australia, and New Zealand. In *Ecological implications of minilivestock: potential of insects, rodents, frogs, and snails*, Paoletti, M.G., Ed.; Science Publishers Inc.: Enfield, NH, USA, 2004; pp. 385-409.
24. Jiang, Y.Y.; Zhao, M.; He, Z.; Wang, C.Y.; Sun, L.; Feng, Y. Nutrition composition and evaluation of six edible dragonfly naiads. *Biotic. Resour.* **2017**, *39*, 352-359, doi:10.14188/j.ajsh.2017.05.007.
25. Boano, G.; Rolando, A. Aggressive interactions and demographic parameters in *Libellula fulva* (Odonata, Libellulidae). *Ital. J. Zool.* **2003**, *70*, 159-166.
26. Li, S.Y. Preliminary report on national edible insect resources in Pu'er Yunnan. *Southwest China J. Agr. Sci.* **2011**, *3*, 1195-1202.
27. Shantibala, T.; Lokeshwari, R.K.; Debaraj, H. Nutritional and antinutritional composition of the five species of aquatic edible insects consumed in Manipur, India. *J. Insect Sci.* **2014**, *14*, 14, doi:10.1093/jis/14.1.14.
28. Hu, P.; Zha, L.S. Records of Chinese Edible Insects. *J. Anhui Agr. Sci.* **2010**, *10*, 114-118.
29. Chung, A.Y.C.; Khen, C.V.; Unchi, S.; Binti, M. Edible insects and entomophagy in Sabah, Malaysia. *Malay. Nat. J.* **2002**, *56*, 131-144.
30. Lukiwati, D.R. Teak caterpillars and other edible insects in Java. In *Proceedings of the Forest insects as food: humans bite back, Proceedings of a workshop on Asia-Pacific resources and their potential for development*, Chiang Mai, Thailand, 2010; pp. 99-103.
31. Wang, C.Y.; Zhao, M.; Wang, J.D.; Jiang, Y.Y.; He, Z.; Feng, Y. Molecular identification of a new species of edible dragonfly. *Biotic. Resour.* **2018**, *40*, 164-169, doi:10.14188/j.ajsh.2018.02.011.
32. Malaisse, F. Se nourrir en forêt claire africaine. Approche écologique et nutritionnelle. *Nature Sciences Société* **1999**, *3*, 88.
33. Sutton, M.Q. The California salmon fly as a food source in northeastern California. *J. California Great Basin Anthropol.* **1985**, *7*, 176-182.
34. Sutton, M.Q. *Insects as food: aboriginal entomophagy in the Great Basin*; Ballena Press: Menlo Park, CA, USA, 1988; pp. 1-155.
35. Torii, C. A note on Zazamushi, a speciality of Tenryū River in Ina. *Shin Konchū* **1957**, *10*, 26-29.
36. Wongsiri, S.; Chen, P.P. Effects of agricultural development on honey bees in Thailand. *Bee World (United Kingdom)* **1995**, *76*, 3-5.
37. De Colombel, V. Les insectes chez dix populations de langue Tchadique (Cameroun). In *Les insectes dans la tradition orale*, Motte-Florac, E., Thomas, J.M.C., Eds.; Peeters: Leuven, Belgium, 2003; pp. 45-62.
38. Nandasena, M.R.M.P.; Disanayake, D.M.S.K.; Weeratunga, L. Sri Lanka as a potential gene pool of edible insects. In *Proceedings of the Forest insects as food: humans bite back, Proceedings of a workshop on Asia-Pacific resources and their potential for development*, Chiang Mai, Thailand, 2010; pp. 161-164.
39. Tchibozo, S. Les insectes comestibles d'Afrique de L'Ouest et Centrale sur Internet. Available online: <http://gbif.africamuseum.be/lincaocnet> (accessed on 22 April 2021).
40. Ramos-Elorduy, J. Anthro-entomophagy: Cultures, evolution and sustainability. *Entomol. Res.* **2009**, *39*, 271-288, doi:10.1111/j.1748-5967.2009.00238.x.
41. Ramos-Elorduy, J. Threatened edible insects in Hidalgo, Mexico and some measures to preserve them. *J. Ethnobiol. Ethnomed.* **2006**, *2*, 51, doi:https://doi.org/10.1186/1746-4269-2-51.
42. Cerritos, R. Insects as food: An ecological, social and economical approach. *CAB Reviews: Perspectives in Agriculture, Veterinary Science, Nutrition and Natural Resources* **2009**, *4*, 1-10, doi:10.1079/PAVSNNR20094027.
43. Ramos-Elorduy, J.; Pino Moreno, J.M. Edible insects of chiapas, Mexico. *Ecol. Food Nutr.* **2002**, *41*, 271-299.
44. Ramos-Elorduy, J.; Pino Moreno, J.M.; Escamilla Prado, E.; Alvarado Perez, M.; Lagunez Otero, J.; Ladron de Guevara, O. Nutritional Value of Edible Insects from the State of Oaxaca, Mexico. *J. Food Compost. Anal.* **1997**, *10*, 142-157, doi:10.1006/jfca.1997.0530.
45. Sangma, R.H.C.; Pal, R.; Singh, D.R. Edible Insects of Northeast India. In *Bioprospecting of Indigenous Bioresources of North-East India*, Purkayastha, J., Ed.; Springer: Singapore, 2016; pp. 253-267.
46. Cao, C.Q. Situation of developing and utilizing sand crawling worm in China and species definition. *Hubei Agr. Sci.* **2014**, *53*, 5061-5064.
47. Paoletti, M.G.; Dufour, D.L. Edible Invertebrates among Amazonian Indians: A Critical Review of Disappearing Knowledge. In *Ecological Implications of Minilivestock: Potential of Insects, Rodents, Frogs and Snails*, Paoletti, M.G., Ed.; Science Publishers Inc.: Enfield, NH, USA, 2005; pp. 293-342.
48. Ruddle, K. The human use of insects: examples from the Yukpa. *Biotropica* **1973**, *5*, 94-101.
49. Mitsuhashi, J. Insects as traditional foods in Japan. *Ecol. Food Nutr.* **1997**, *36*, 187-199.

50. Chen, S.Z.; Yi, L.L.; Ren, W.Y.; Huang, C.J.; Cao, C.Q. Oviposition habits and biological characteristics of *Protohermes xanthodes*. *Jiangsu Agr. Sci.* **2012**, *40*, 366-368.
51. Ramos-Elorduy, J.; Pino Moreno, J.M.; Martínez Camacho, V.H. Edible aquatic Coleoptera of the world with an emphasis on Mexico. *J. Ethnobiol. Ethnomed.* **2009**, *5*, 11, doi:10.1186/1746-4269-5-11.
52. Ramos-Elorduy, J.; Pino Moreno, J.M. Los coleoptera comestibles de México. *Anales del Instituto de Biología. Serie Zoología* **2004**, *75*, 149-183.
53. Decary, R. L'entomophagie chez les indigènes de Madagascar. *Bull. Soc. Entomol. Fr.* **1937**, *42*, 168-171.
54. Meyer-Rochow, V.B. Ethno-entomological observations from North Korea (officially known as the "Democratic People's Republic of Korea"). *J. Ethnobiol. Ethnomed.* **2013**, *9*, 1-8.
55. Jäch, M.A. Fried water beetles Cantonese style. *Am. Entomol.* **2003**, *49*, 34-37.
56. Feng, Y.; Chen, X.M.; Zhao, M. *Edible Insects of China*; Science press: Beijing, China, 2016; pp. 1-313.
57. Riggi, L.; Veronesi, M.; Verspoor, R.; MacFarlane, C. *Exploring Entomophagy in Northern Benin - Practices, Perceptions and Possibilities*; Bugs for life: London, UK, 2013; pp. 1-40.
58. Pemberton, R.W. Contemporary use of insects and other arthropods in traditional Korean medicine (hanbang) in South Korea and elsewhere. In *Ecological Implications of Minilivestock: Potential of Insects, Rodents, Frogs and Sails*, Paoletti, M.G., Ed.; Science Publishers Inc.: Enfield, NH, USA, 2005; pp. 459-474.
59. Lumsa-ad, C. Study on the species and the nutrition values of edible insects in upper southern Thailand. *Kaen Kaset* **2001**, *29*, 45-49.
60. İncekara, Ü.; Türkez, H. The genotoxic effects of some edible insects on human whole blood cultures. *Munis Entomol. Zool.* **2009**, *4*, 531-535.
61. Ramos-Elorduy, J. La etnoentomología en la alimentación, la medicina y el reciclaje. In *Biodiversidad, Taxonomía y Biogeografía de Artrópodos de México: hacia una síntesis de su conocimiento*, Llorente, J.B., Morrone, J., Yanez, O.O., Vargas, I.F., Eds.; National University Press: Mexico City, Mexico, 2004; pp. 329-413.
62. Welch, D.M. Aboriginal culture. Available online: <https://www.aboriginalculture.com.au/> (accessed on 6 April 2021).
63. Utsunomiya, Y.; Masumoto, K. Edible beetles (Coleoptera) from northern Thailand. *Elytra* **1999**, *27*, 191-198.
64. Bergeron, D.; Bushway, R.J.; Roberts, F.L.; Kornfield, I.; Okedi, J.; Bushway, A.A. The nutrient composition of an insect flour sample from Lake Victoria, Uganda. *J. Food Comp. Anal.* **1988**, *1*, 371-377, doi:https://doi.org/10.1016/0889-1575(88)90038-5.
65. MacDonald, W.W. Observations on the biology of chaoborids and chironomids in Lake Victoria and on the feeding habits of the elephant-snout fish (*Mormyrus kannume* Forsk.). *J. Anim. Ecol.* **1956**, *25*, 36-53.
66. Bergier, E. *Peuples entomophages et insectes comestibles: étude sur les mœurs de l'homme et de l'insecte*; Imprimerie Rulliere Freres: Avignon, France, 1986.
67. DeLong, D.M. Man in a world of insects. *The Ohio J. Sci.* **1960**, *60*, 193.
68. Ramos-Elorduy, J.; Pino Moreno, J.M.; Márquez, C.; Rincón, F.; Alvarado, M.; Escamilla, E.; Bourges, H. Protein content of some edible insects in Mexico. *J. Ethnobiol.* **1984**, *4*, 61-72.
69. Costa Neto, E.M.; Ramos-Elorduy, J. Los insectos comestibles de Brasil: etnicidad, diversidad e importancia en la alimentación. *Boletín Sociedad Entomológica Aragonesa* **2006**, *38*, 423-442.
